# Supplementary material for: Plasma microRNA expression profiles in Chinese patients with rheumatoid arthritis
Source: PubMed Central journal article supplement (PMC4767452; doi:10.18632/oncotarget.6449), 2015-12-02
Supplement: oncotarget-06-42557-s001.pdf [file oncotarget-06-42557-s001.pdf]

## Plasma microRNA expression profiles in Chinese patients with rheumatoid arthritis

### Supplementary Material

**Supplemental Table 1** Up- and down-regulated miRNAs in plasma samples from RA patients compared with HCs determined using the miRCURY™ LNA Array.

| <b>Up-regulated miRNAs (n=22)</b>   |                    |             |            |                 |                    |                |
|-------------------------------------|--------------------|-------------|------------|-----------------|--------------------|----------------|
| <b>ID</b>                           | <b>Gene symbol</b> | <b>Rank</b> | <b>RAs</b> | <b>Controls</b> | <b>Fold-change</b> | <b>P-value</b> |
| 168878                              | hsa-miR-5100       | 1           | 1.000133   | 0.294362        | 3.397632           | 0.000613       |
| 169118                              | hsa-miR-5009-3p    | 2           | 0.11483    | 0.063456        | 1.809601           | 0.000645       |
| 168852                              | hsa-miR-4764-5p    | 3           | 3.426527   | 1.827897        | 1.874573           | 0.004911       |
| 168838                              | hsa-miR-720        | 4           | 0.419313   | 0.154747        | 2.709663           | 0.007281       |
| 169335                              | hsa-miR-4699-5p    | 5           | 0.114357   | 0.044225        | 2.585782           | 0.009556       |
| 42551                               | hsa-miR-122-3p     | 6           | 0.287497   | 0.129671        | 2.217132           | 0.010299       |
| 169310                              | hsa-miR-3913-3p    | 7           | 0.535137   | 0.295698        | 1.809741           | 0.010459       |
| 46380                               | hsa-miR-1255a      | 8           | 0.996117   | 0.612083        | 1.627423           | 0.010577       |
| 168849                              | hsa-miR-4635       | 9           | 0.120057   | 0.042092        | 2.852235           | 0.010942       |
| 148064                              | hsa-miR-3926       | 10          | 0.114758   | 0.059833        | 1.917982           | 0.013399       |
| 168872                              | hsa-miR-24-1-5p    | 11          | 0.160399   | 0.054158        | 2.961697           | 0.013492       |
| 169319                              | hsa-miR-3136-3p    | 12          | 2.877488   | 1.54198         | 1.866099           | 0.01384        |
| 169140                              | hsa-miR-3150a-5p   | 13          | 5.961167   | 3.024471        | 1.970978           | 0.020444       |
| 168616                              | hsa-miR-4536-3p    | 14          | 0.090053   | 0.038444        | 2.342417           | 0.022176       |
| 169072                              | hsa-miR-3925-3p    | 15          | 0.19699    | 0.128511        | 1.532867           | 0.024553       |
| 168834                              | hsa-miR-5571-5p    | 16          | 0.368272   | 0.228677        | 1.610449           | 0.024682       |
| 168650                              | hsa-miR-3121-5p    | 17          | 0.265737   | 0.166803        | 1.593113           | 0.025936       |
| 168627                              | hsa-miR-4678       | 18          | 1.123368   | 0.286157        | 3.925703           | 0.035873       |
| 17529                               | hcmv-miR-US25-2-3p | 19          | 0.169993   | 0.085289        | 1.993149           | 0.046009       |
| 169411                              | hsa-miR-205-3p     | 20          | 1.875961   | 1.106103        | 1.696009           | 0.04745        |
| 30033                               | hsa-miR-877-5p     | 21          | 2.275638   | 1.221841        | 1.862466           | 0.048146       |
| 145831                              | hsa-miR-625-5p     | 22          | 6.350872   | 1.544279        | 4.112517           | 0.04913        |
| <b>Down-regulated miRNAs (n=11)</b> |                    |             |            |                 |                    |                |
| 169408                              | hsa-miR-181d       | 1           | 0.259705   | 0.476157        | 0.545418           | 0.000661       |
| 42957                               | hsa-miR-323a-3p    | 2           | 0.093783   | 0.232713        | 0.403              | 0.007403       |
| 145637                              | hsa-miR-187-3p     | 3           | 0.751956   | 1.29768         | 0.579462           | 0.013015       |
| 32884                               | hsa-miR-342-3p     | 4           | 0.078643   | 0.150178        | 0.523665           | 0.014757       |
| 169263                              | hsa-miR-4634       | 5           | 0.013533   | 0.134088        | 0.100924           | 0.022005       |
| 4040                                | hsa-miR-9-5p       | 6           | 0.768069   | 2.06374         | 0.372173           | 0.039091       |
| 146159                              | hsv1-miR-H4-3p     | 7           | 3.930276   | 9.655809        | 0.407037           | 0.039308       |
| 42834                               | hsa-miR-219-2-3p   | 8           | 0.137126   | 0.425542        | 0.322238           | 0.041348       |
| 145943                              | hsa-miR-100-5p     | 9           | 0.13703    | 0.329753        | 0.415554           | 0.041422       |
| 10928                               | hsa-miR-125a-5p    | 10          | 1.627243   | 2.672568        | 0.608869           | 0.042549       |

|        |              |    |          |          |          |          |
|--------|--------------|----|----------|----------|----------|----------|
| 169376 | hsa-miR-5701 | 11 | 0.496877 | 0.048581 | 0.355479 | 0.715426 |
|--------|--------------|----|----------|----------|----------|----------|

Data are expressed as the medians. ID: array ID of the probes; *P*-value, T-test results from comparisons between RA patients and HCs; Rank, Ranked by *P*-value in screening phase; Fold change, the ratio of normalized intensities between samples of the different groups.

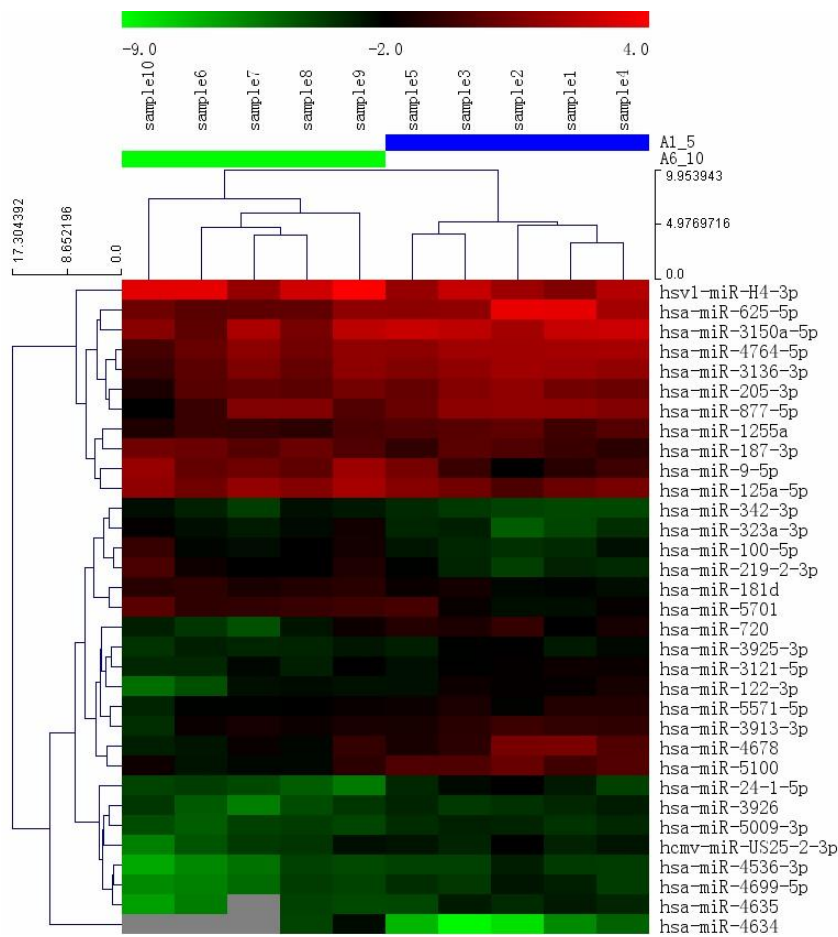

**Supplemental Fig. 1** miRNA screening using the miRCURY™ LNA Array. Heat map clustering of the miRNA microarray data from the RA patients and controls; HCs (blue) and RA (green) showing the up-regulated miRNAs (in red; the majority of changes) and the down-regulated miRNAs (in green; fewer changes) in RA patient plasma. The heat map diagram shows results from two-way hierarchical clustering of miRNAs and samples. Each row denotes an individual miRNA, and each column denotes a sample. The miRNA clustering tree is shown on the left, and the sample clustering tree appears at the top. The color scale shown at the top illustrates the relative miRNA expression levels using grading: a red color denotes high relative expression levels, and a green color denotes low relative expression levels.
